# Supplementary material for: Platelet-derived β2M regulates monocyte inflammatory responses
Source: JCI journal article supplement (doi:10.1172/jci.insight.122943), 2019-01-31
Supplement: sd1 [file 1]

You are being redirected.
